# Supplementary material for: The Phenotypic Spectrum of Patients with PHARC Syndrome Due to Variants in ABHD12: An Ophthalmic Perspective
Source: MDPI journal article supplement (doi:10.3390/genes12091404), 2021-09-11
Supplement: s1 [file s1]

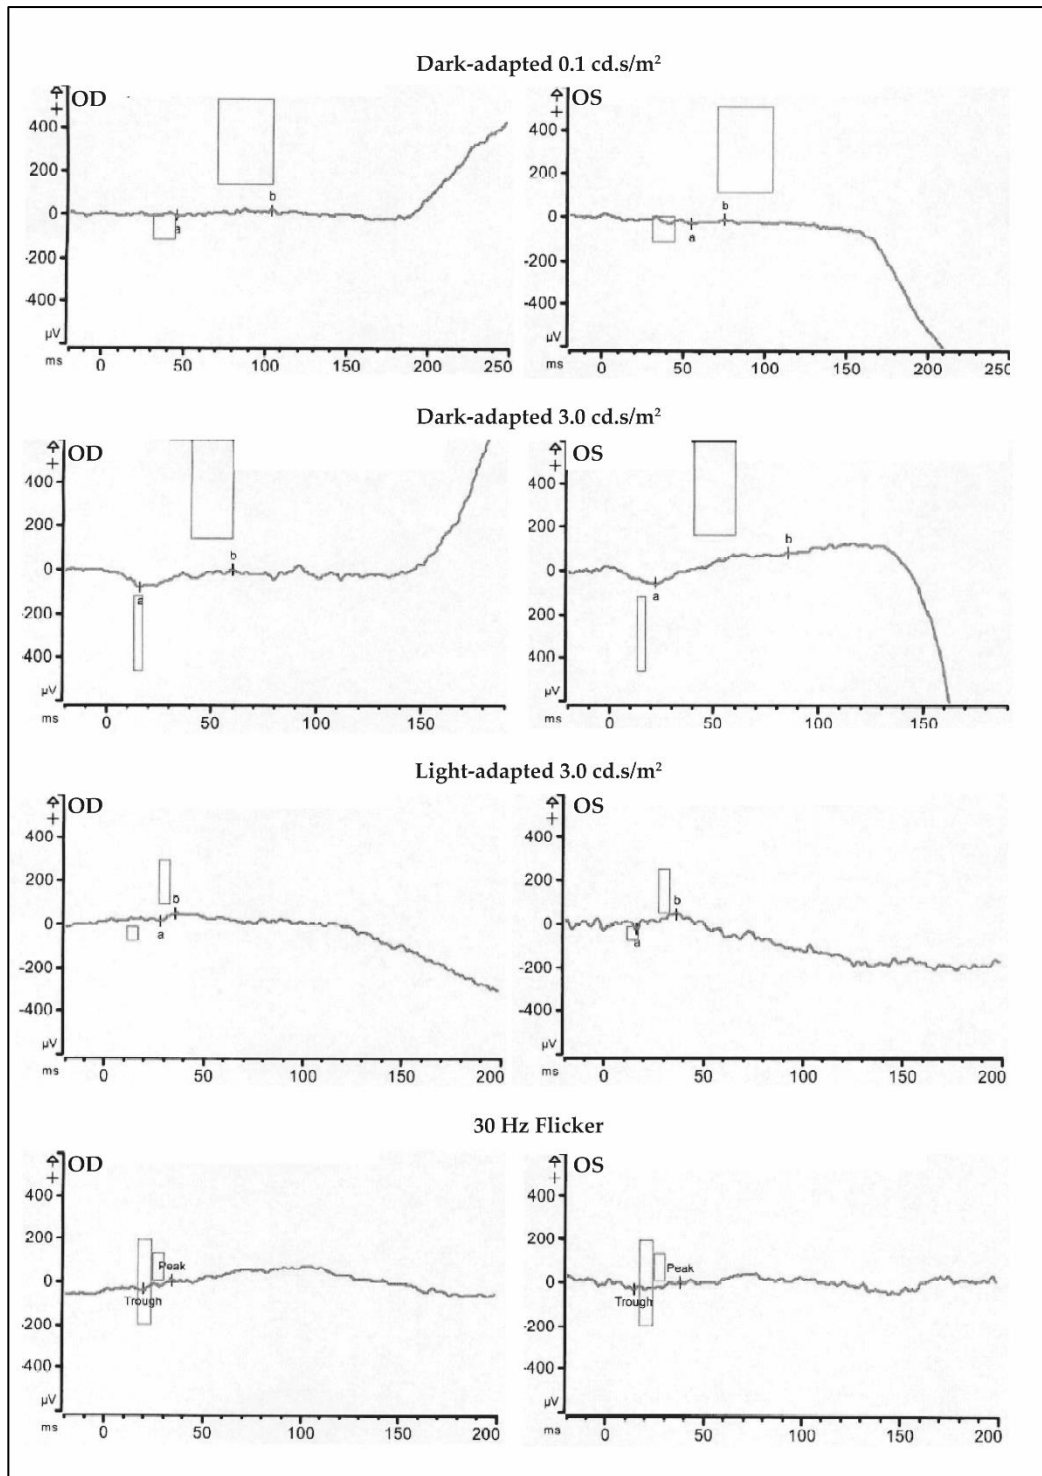

**Supplemental Figure S1.** Full-field electroretinography (ERG) results of a patient with PHARC (polyneuropathy, hearing loss, ataxia, retinitis pigmentosa and early-onset cataract) syndrome. Full-field ERG responses in both eyes of patient A-1 at the age of 47. Full-field ERGs were performed according to the 'International Society for Clinical Electrophysiology of Vision' standards. Rod responses are (nearly) absent in both eyes, with minimal cone responses measured on light-adapted ERGs. cd.s./m<sup>2</sup> = candela seconds per square meter; Hz = hertz; µV=microvolts; ms = milliseconds; OD = right eye; OS = left eye.
