# Supplementary material for: The Phenotypic Spectrum of Patients with PHARC Syndrome Due to Variants in ABHD12: An Ophthalmic Perspective
Source: MDPI journal article supplement (doi:10.3390/genes12091404), 2021-09-11
Supplement: s1 [file s1]

**Supplemental Table S1.** Overview of ABHD12 variants found in this study

| Nucleotide change  | Protein effect     | Mutation type | Frequency (n =) | SIFT                     | Align GVG D | Polyphen-2        | References                                                 |
|--------------------|--------------------|---------------|-----------------|--------------------------|-------------|-------------------|------------------------------------------------------------|
| c.193C>T           | p.(Arg65*)         | Nonsense      | 2               | -                        | -           | -                 | Eisenberger <i>et al.</i> 2012, Igelman <i>et al.</i> 2021 |
| c.337_338delinsTTT | p.(Asp113Phefs*15) | Frameshift    | 13              | -                        | -           | -                 | Fiskerstrand <i>et al.</i> 2010                            |
| c.341dup           | p.(Leu114Phefs*14) | Frameshift    | 1               | -                        |             | -                 | <b>This study</b>                                          |
| c.374C>T           | p.(Thr125Met)      | Missense      | 1               | Affects protein function | C65         | Probably damaging | Igelman <i>et al.</i> 2021                                 |
| c.423-1_425del     | p.(?)              | Splice site   | 3               | -                        | -           | -                 | <b>This study</b>                                          |
| c.477G>A           | p.(Trp159*)        | Nonsense      | 1               | -                        | -           | -                 | Nishiguchi <i>et al.</i> 2014                              |
| c.557G>C           | p.(Arg186Pro)      | Missense      | 1               | Affects protein function | C65         | Probably damaging | Nishiguchi <i>et al.</i> 2014                              |
| c.620-2A>G         | p.(?)              | Splice site   | 2               | -                        | -           | -                 | Igelman <i>et al.</i> 2021                                 |
| c.784C>T           | p.(Arg262*)        | Nonsense      | 1               | -                        | -           | -                 | Thimm <i>et al.</i> 2020, Igelman <i>et al.</i> 2021       |
| c.867+5G >A        | p.(?)              | Splice site   | 1               | -                        | -           | -                 | Ellingford <i>et al.</i> 2019                              |
| c.1063C>T          | p.(Arg355*)        | Nonsense      | 2               | -                        | -           | -                 | <b>This study</b>                                          |
| c.1075del          | p.(Val359Phefs*27) | Frameshift    | 1               | -                        | -           | -                 | <b>This study</b>                                          |
| c.1154T>C          | p.(Leu385Pro)      | Missense      | 1               | Affects protein function | C65         | Probably damaging | Igelman <i>et al.</i> 2021                                 |

Nucleotide numbering is based on the reference sequence NM\_001042472.3. The Human Gene Mutation Database was accessed on July 5<sup>th</sup>, 2021.
